# Supplementary material
Source: PubMed Central journal article supplement (PMC4144719)
Supplement: mp500343j_si_001.pdf [file mp500343j_si_001.pdf]

## Supporting Information

# <sup>44</sup>Sc: an attractive isotope for peptide-based PET imaging

*Reinier Hernandez<sup>1</sup>, Hector F. Valdovinos<sup>1</sup>, Yunan Yang<sup>2</sup>, Rubel Chakravarty<sup>2,3</sup>, Hao Hong<sup>2</sup>,  
Todd E. Barnhart<sup>1</sup>, Weibo Cai<sup>\*1,2,4</sup>*

<sup>1</sup> Department of Medical Physics, University of Wisconsin - Madison, WI, USA

<sup>2</sup> Department of Radiology, University of Wisconsin - Madison, WI, USA

<sup>3</sup> Isotope Production and Applications Division, Bhabha Atomic Research Centre, Mumbai  
400085, India

<sup>4</sup> University of Wisconsin Carbone Cancer Center, Madison, WI, USA

## Supplementary Figures and Tables

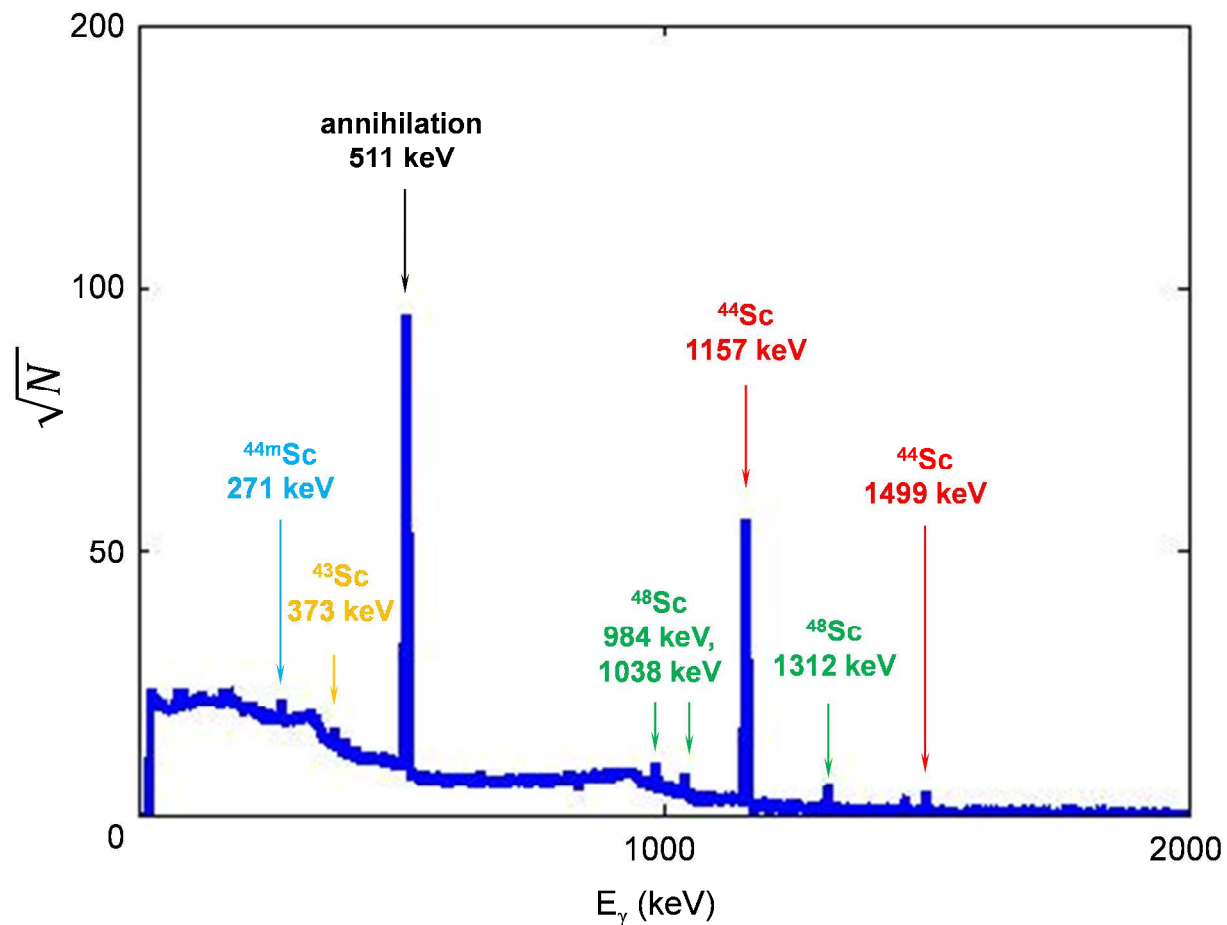

**Figure S1.** Gamma spectrum of  $^{44}\text{Sc}$  after separation (y axis represents the square root of the count collected for each particular energy channel). The arrows point to the most prominent gamma lines of the isotopes present in the product.

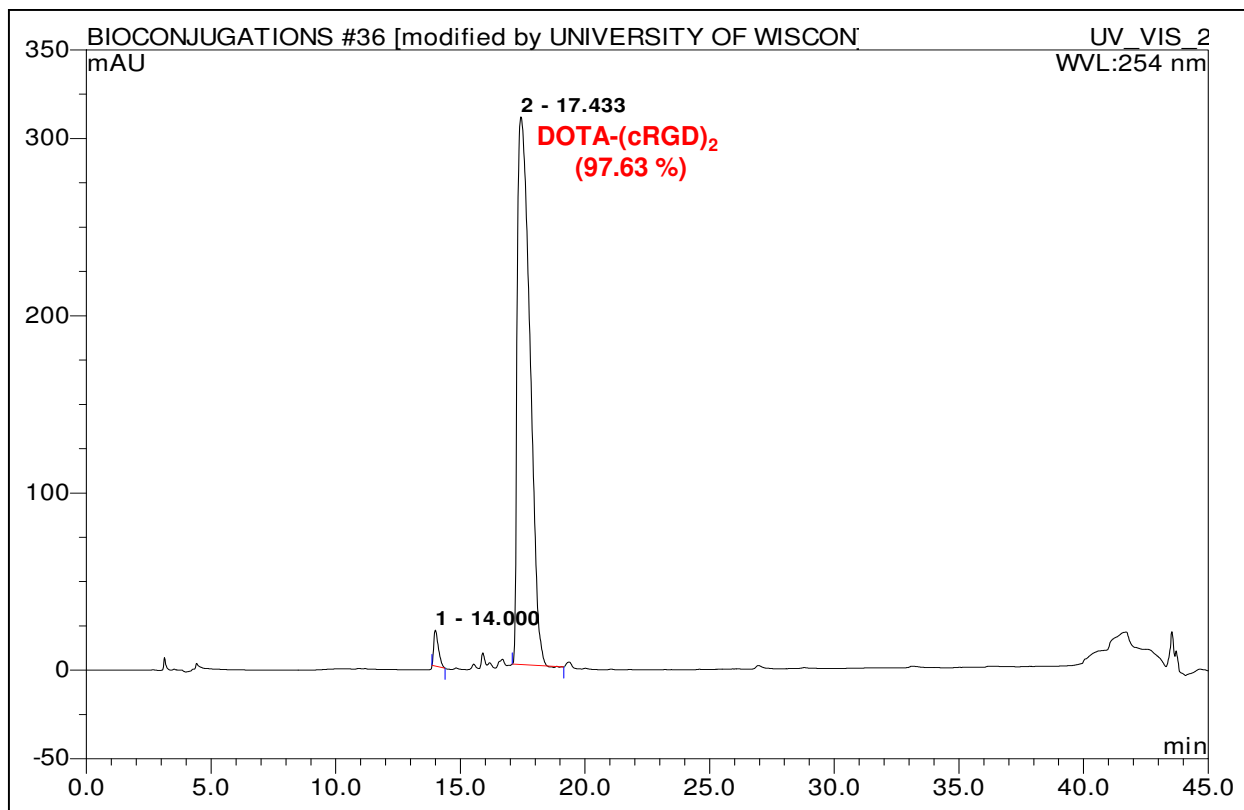

**Figure S2.** HPLC showing high purity of DOTA-(cRGD)<sub>2</sub> (column: Acclaim® 120 C18, 5µm, 4.6 × 250 mm; flow: 1mL/min; mobile phase: linear gradient from 5% EtOH at t = 0 to 65% EtOH at t = 40 min)

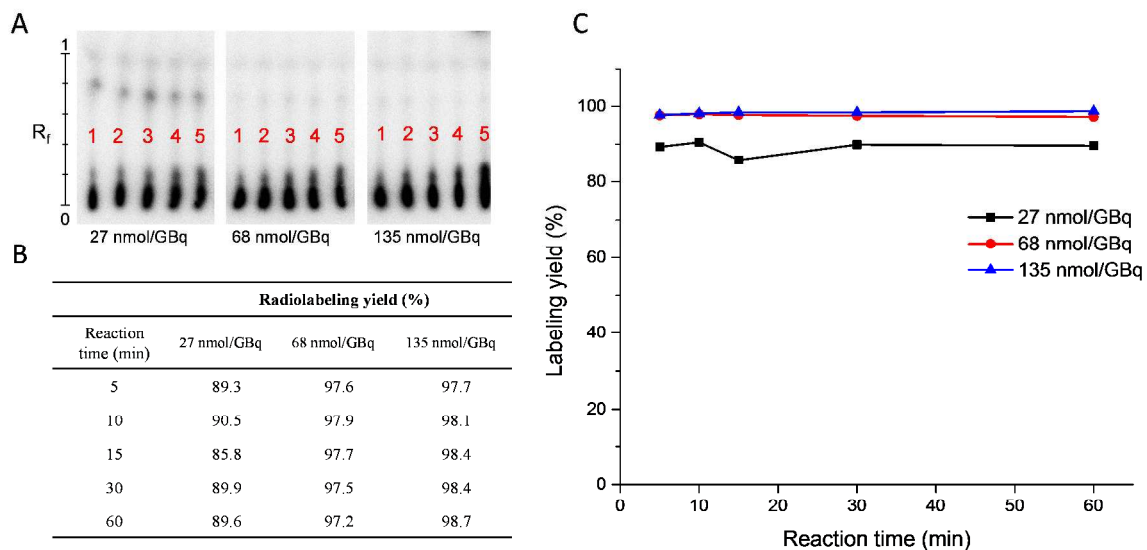

**Figure S3.** Optimization of the conditions for  $^{44}\text{Sc}$ -labeling of DOTA-(cRGD) $_2$ . **(A)** Radio-TLC showing the time progression; lanes 1-5 correspond to 5, 10, 15, 30, 60 min of radiolabeling time with different amount of DOTA-(cRGD) $_2$  (27, 68, and 135 nmol/GBq of  $^{44}\text{Sc}$ ). Radio-TLCs were run in 0.1 M sodium citrate (pH 4.5);  $^{44}\text{Sc}$ -DOTA-(cRGD) $_2$  remains at the origin ( $R_f = 0-0.2$ ) whereas free  $^{44}\text{Sc}$  moves with the solvent front ( $R_f = 0.6-1.0$ ). **(B)** Radiolabeling yield (%) calculated from quantitative analysis of radio-TLC. **(C)** The influence of time and amount of precursor on the radiolabeling yield.

**Table S1.** Quantitative data of  $^{44}\text{Sc}$ -DOTA-(cRGD)<sub>2</sub> uptake in U87MG tumor-bearing nude mice

| $^{44}\text{Sc}$ -DOTA-(cRGD) <sub>2</sub> tissue uptake*(%ID/g) |            |                            |           |                          |           |                          |
|------------------------------------------------------------------|------------|----------------------------|-----------|--------------------------|-----------|--------------------------|
| Organ                                                            | 0.5 h p.i. | 0.5 h p.i. with blocking** | 2 h p.i.  | 2 h p.i. with blocking** | 4 h p.i.  | 4 h p.i. with blocking** |
| Tumor                                                            | 3.93±1.19  | 1.02±0.25                  | 3.07±1.17 | 0.14±0.04                | 3.00±1.25 | 0.06±0.01                |
| Heart/Blood                                                      | 0.98±0.14  | 1.06±0.26                  | 0.36±0.08 | 0.05±0.01                | 0.34±0.07 | 0.02±0.01                |
| Liver                                                            | 1.73±0.47  | 0.65±0.14                  | 1.55±0.53 | 0.11±0.02                | 1.46±0.57 | 0.05±0.01                |
| Kidney                                                           | 3.53±1.36  | 3.17±0.40                  | 1.63±0.47 | 0.63±0.17                | 1.50±0.44 | 0.21±0.05                |
| Muscle                                                           | 0.60±0.13  | 0.41±0.12                  | 0.35±0.17 | 0.04±0.02                | 0.31±0.15 | 0.03±0.01                |

\*Values shown represent mean±SD (n=3)  
\*\*Blocking group was co-injected with a 50mg/kg dose of (cRGD)<sub>2</sub>

**Table S2.** *Ex vivo* biodistribution of  $^{44}\text{Sc}$ -DOTA-(cRGD) $_2$  in U87MG tumor-bearing nude mice

| Organ     | $^{44}\text{Sc}$ -DOTA-(cRGD) $_2$ tissue uptake*(%ID/g) |                        |
|-----------|----------------------------------------------------------|------------------------|
|           | 4 h p.i.                                                 | 4 h p.i. with blocking |
| Tumor     | 2.48±0.76                                                | 0.128±0.020            |
| Blood     | 0.02±0.00                                                | 0.008±0.002            |
| Skin      | 0.64±0.33                                                | 0.117±0.025            |
| Muscle    | 0.15±0.09                                                | 0.023±0.003            |
| Bone      | 0.35±0.24                                                | 0.025±0.004            |
| Heart     | 0.18±0.09                                                | 0.024±0.006            |
| Lung      | 0.44±0.23                                                | 0.058±0.007            |
| Liver     | 1.07±0.65                                                | 0.106±0.027            |
| Kidney    | 1.56±0.48                                                | 1.287±0.261            |
| Spleen    | 0.83±0.45                                                | 0.064±0.016            |
| Pancreas  | 0.15±0.06                                                | 0.019±0.005            |
| Stomach   | 0.71±0.30                                                | 0.042±0.010            |
| Intestine | 1.58±1.02                                                | 0.055±0.013            |
| Brain     | 0.03±0.01                                                | 0.008±0.002            |

\*Values shown represent mean±SD (n=3)
